# Supplementary material for: Determination of volatile organic compounds in child care centers by thermal desorption gas chromatography-mass spectrometry
Source: Royal Society of Chemistry journal article supplement (doi:10.1039/c7ay02570j), 2018-01-01
Supplement: c7ay02570j1.pdf [file c7ay02570j1.pdf]

## Supplemental information

### **Determination of Volatile Organic Compounds in Child Care Centers by Thermal Desorption Gas Chromatography-Mass Spectrometry**

D. C. Vu<sup>a,b</sup>, T.L. Ho<sup>c</sup>, P. H. Vo<sup>a</sup>, G. Carlo<sup>d</sup>, J.A. McElroy<sup>e</sup>, A. N. Davis<sup>f</sup>, S.C. Nagel<sup>g</sup>, and C.-H. Lin<sup>\*a,b</sup>

<sup>a</sup> Center for Agroforestry, School of Natural Resources, University of Missouri, Columbia, MO, USA.

\* Email: linchu@missouri.edu

<sup>b</sup> Department of Forestry, School of Natural Resources, University of Missouri, Columbia, MO, USA.

<sup>c</sup> Center of Core Facilities, Cuu Long Delta Rice Research Institute, Vietnam.

<sup>d</sup> Center for Children and Families Across Cultures, Department of Human Development and Family Science, University of Missouri, Columbia, MO, USA

<sup>e</sup> Department of Family and Community Medicine, University of Missouri, Columbia, MO, USA

<sup>f</sup> Department of Individual, Family, and Community Education, University of New Mexico, NM, USA

<sup>g</sup> Department of Obstetrics, Gynecology and Women's Health, School of Medicine, University of Missouri

Table S1. Summary of volatile organic compounds screened in the study

| No. | Compounds                                        | Substance group    | Classification of toxicity                     |              | Emission sources and uses                         |
|-----|--------------------------------------------------|--------------------|------------------------------------------------|--------------|---------------------------------------------------|
|     |                                                  |                    | Toxicity*                                      | Sources**    |                                                   |
| 1   | 1,1,1-Trichloroethane                            | Halogenated alkane | neurotoxic to humans                           | ATSDR        | solvent for inks, paints                          |
| 2   | 1,1,2-Trichloro-1,2,2-trifluoroethane (CFC-113a) | Halogenated alkane | ozone depleting chemical                       | EPA          | used as a refrigerant                             |
| 3   | 1,1,2-Trichloroethane                            | Halogenated alkane | possible human carcinogen                      | EPA          | solvent                                           |
| 4   | 1,1-Dichloroethane                               | Halogenated alkane | possible human carcinogen                      | EPA          | used as a solvent, cleaning agent                 |
| 5   | 1,1-Dichloroethene                               | Halogenated alkene | potential occupational carcinogen              | CDC          | used in the productions of PVC, polyacrylonitrile |
| 6   | 1,2,3-Trimethylbenzene                           | Aryl hydrocarbon   | health hazard                                  | ATSDR        | used in jet fuel                                  |
| 7   | 1,2,4-Trimethylbenzene                           | Aryl hydrocarbon   | toxic to aquatic life                          | CDC          | solvent for industrial coatings, sealants         |
| 8   | 1,2-Dibromo-3-chloropropane                      | Halogenated alkane | possible human carcinogen; endocrine disruptor | IARC<br>TEDX | soil fumigant, pesticide ingredient               |
| 9   | 1,2-Dibromoethane                                | Halogenated alkane | probable human carcinogen; endocrine disruptor | EPA<br>TEDX  | fumigant for log treatment                        |

---

|    |                                                |                       |                           |       |                                                 |
|----|------------------------------------------------|-----------------------|---------------------------|-------|-------------------------------------------------|
| 10 | 1,2-Dichloro-1,1,2,2-tetrafluoroethane (R-114) | Halogenated alkane    | ozone depleting chemical  | EPA   | used as a refrigerant                           |
| 11 | 1,2-Dichlorobenzene                            | Halogenated aryl      | endocrine disruptor       | TEDX  | fumigant, insecticide                           |
| 12 | 1,2-Dichloroethane                             | Halogenated alkane    | possible human carcinogen | IARC  | used as a degreaser and paint remover           |
| 13 | 1,2-Dichloroethene                             | Halogenated alkene    | health hazard             | ATSDR | solvent for dyes, lacquers                      |
| 14 | 1,2-Dichloropropane                            | Halogenated alkane    | human carcinogen          | IARC  | industrial solvent in paint strippers, vanishes |
| 15 | 1,3,5-Trimethylbenzene                         | Aryl hydrocarbon      | toxic to aquatic life     | CDC   | solvent for industrial coatings, sealants       |
| 16 | 1,3-Butadiene                                  | Alkyne                | human carcinogen          | IARC  | used in synthetic rubber production             |
| 17 | 1,3-Dichlorobenzene                            | Halogenated aryl      | endocrine disruptor       | TEDX  | fumigant and insecticide                        |
| 18 | 1,4-Dichlorobenzene                            | Halogenated aryl      | possible human carcinogen | EPA   | room deodorizers, toilet deodorants             |
| 19 | 1,4-Dioxane                                    | Heterocyclic ether    | possible human carcinogen | IARC  | component of dye baths, paints                  |
| 20 | 1-Butanol                                      | Alcohol               | not classified            |       | paint thinner                                   |
| 21 | 1-Dodecanesulfonyl chloride                    | Alkyl sulfonyl halide | not classified            |       | surfactant                                      |

---

|    |                                    |                   |                                      |         |                                               |
|----|------------------------------------|-------------------|--------------------------------------|---------|-----------------------------------------------|
| 22 | 1-Eicosanol                        | Fatty alcohol     | not classified                       |         | emollient in cosmetics                        |
| 23 | 1-Hexadecanol                      | Fatty alcohol     | not classified                       |         | emollient in cosmetics                        |
| 24 | 1-Octadecanol                      | Fatty alcohol     | not classified                       |         | component in skin care and hair care products |
| 25 | 2-(2-Ethoxyethoxy)ethanol (22EE)   | Glycol ether      | not classified                       |         | used ink, toner, and colorant products        |
| 26 | 2-(2-Methoxyethoxy)ethanol (22MEE) | Glycol ether      | endocrine disruptor                  | TEDX    | textile dye paste, solvent for wood stains    |
| 27 | 2-Butanone (MEK)                   | Ketone            | endocrine disruptor                  | TEDX    | used in dry eraser makers                     |
| 28 | 2-Butoxyethanol                    | Glycol ether      | endocrine disruptor                  | TEDX    | solvent for inks, paints, surface coatings    |
| 29 | 2-Butyl-1-octanol                  | Alcohol           | not classified                       |         | humectant in cosmetics                        |
| 30 | 2-Ethylhexanol-1                   | Alcohol           | endocrine disruptor                  | TEDX    | used in manufacture of styrene                |
| 31 | 2-Ethylhexyl salicylate            | Hydroxyaryl ester | not classified                       |         | sunscreen ingredient                          |
| 32 | 2-Ethyltoluene                     | Aryl hydrocarbon  | health hazard; toxic to aquatic life | PubChem | solvent                                       |
| 33 | 2-Hexanone (MBK)                   | Ketone            | health hazard; neurotoxic to animals | ATSDR   | industrial solvent, ingredient in paint       |
| 34 | 2-Propanol                         | Alcohol           | not classified                       |         | solvent for coatings                          |

|    |                      |                    |                                      |         |                                                 |
|----|----------------------|--------------------|--------------------------------------|---------|-------------------------------------------------|
| 35 | 3-Carene             | Cyclic terpene     | not classified                       |         | constituent of turpentine                       |
| 36 | 3-Ethyltoluene       | Aryl hydrocarbon   | health hazard; toxic to aquatic life | PubChem | solvent                                         |
| 37 | 4-Ethyltoluene       | Aryl hydrocarbon   | health hazard                        | PubChem | solvent                                         |
| 38 | 4-Methyl-2-pentanone | Ketone             | possible human carcinogen            | IARC    | solvent for resins and paints                   |
| 39 | Acetone              | Ketone             | endocrine disruptor                  | TEDX    | component in nail removers, superglue removers  |
| 40 | Acetophenone         | Aryl ketone        | not classified                       |         | components of inks and coatings                 |
| 41 | Acrolein             | Aldehyde           | not classified                       |         | herbicide                                       |
| 42 | Acrylonitrile        | Nitrile compound   | probable human carcinogen            | EPA     | used in manufacture of plastics, resins, rubber |
| 43 | Allyl chloride       | Halogenated alkene | possible human carcinogen            | EPA     | used in manufacture of pesticides               |
| 44 | $\alpha$ -Pinene     | Cyclic terpene     | not classified                       |         | lube oil additives, flavoring odorant           |
| 45 | Benzaldehyde         | Aryl aldehyde      | endocrine disruptor                  | TEDX    | food additive, cosmetic ingredient              |
| 46 | Benzene              | Aryl hydrocarbon   | human carcinogen                     | EPA     | household product ingredient; solvent           |
| 47 | Benzothiazole        | Aromatic           | not classified                       |         | rubber accelerator,                             |

|    |                         |                    |                                                     |             |                                                                  |
|----|-------------------------|--------------------|-----------------------------------------------------|-------------|------------------------------------------------------------------|
|    |                         | heterocyclic       |                                                     |             | antimicrobial agent                                              |
| 48 | Benzyl chloride         | Halogenated aryl   | probable human carcinogen; endocrine disruptor      | EPA<br>TEDX | used in manufacture of dyes, pharmaceutical and perfume products |
| 49 | Bromodichloromethane    | Halogenated alkane | possible human carcinogen                           | CDC         | solvent for fats and waxes, flame retardant                      |
| 50 | Bromoform               | Halogenated alkane | hazardous to environment; probable human carcinogen | EPA         | solvent                                                          |
| 51 | Butanal                 | Aldehyde           | not classified                                      |             | solvent                                                          |
| 52 | Butyl acetate           | Ester              | not classified                                      |             | used as synthetic fruit flavoring                                |
| 53 | Carbon disulfide        | Sulfide            | endocrine disruptor                                 | TEDX        | used in manufacture of rayon                                     |
| 54 | Carbon tetrachloride    | Halogenated alkane | probable human carcinogen; endocrine disruptor      | EPA<br>TEDX | once used as a dry clean solvent, refrigerant                    |
| 55 | Chlorobenzene           | Halogenated aryl   | health hazard                                       | CDC         | industrial solvent                                               |
| 56 | Chloroethane            | Halogenated alkane | not classified                                      |             | used as a blowing agent in foamed plastics                       |
| 57 | cis-1,3-Dichloropropene | Halogenated alkene | possible human carcinogen                           | IARC        | preplanting fumigant                                             |
| 58 | Cyclohexane             | Cycloalkane        | health hazard; toxic to aquatic life                | CDC         | organic solvent in laboratory                                    |

|    |                              |                       |                                                      |              |                                                                    |
|----|------------------------------|-----------------------|------------------------------------------------------|--------------|--------------------------------------------------------------------|
| 59 | Decamethylcyclopentasiloxane | Organosilicon         | endocrine disruptor                                  | TEDX         | personal care products,<br>cosmetic ingredient                     |
| 60 | Decanal                      | Aldehyde              | not classified                                       |              | used in fragrances and<br>flavoring                                |
| 61 | Decane                       | Alkane                | health hazard; toxic to<br>aquatic life              | CDC          | component of fuels                                                 |
| 62 | Dibromochloromethane         | Halogenated<br>alkane | not classified                                       |              | solvent,<br>once used as flame retardant                           |
| 63 | Dichlorodifluoromethane      | Halogenated<br>alkane | ozone depleting<br>chemical                          | EPA          | once used as a refrigerant                                         |
| 64 | D-Limonene                   | Cyclic terpene        | not classified                                       |              | cleaning and furnishing care<br>products                           |
| 65 | Dodecane                     | Alkane                | health hazard; toxic to<br>aquatic life              | PubChem      | component of fuels                                                 |
| 66 | Ethyl acetate                | Ester                 | health hazard                                        | CDC          | used in nail vanish removers                                       |
| 67 | Ethylbenzene                 | Aryl hydrocarbon      | possible human<br>carcinogen; endocrine<br>disruptor | IARC<br>TEDX | solvent for paints, adhesives,<br>household degreasing<br>cleaners |
| 68 | <i>g</i> -Terpinene          | Cyclic terpene        | not classified                                       |              | used in cosmetics and food<br>industries                           |
| 69 | Heptanal                     | Aldehyde              | not classified                                       |              | used in production of<br>perfumes                                  |

|    |                           |                       |                                                     |             |                                                       |
|----|---------------------------|-----------------------|-----------------------------------------------------|-------------|-------------------------------------------------------|
| 70 | Heptane                   | Alkane                | health hazard                                       | CDC         | used in paints, coatings                              |
| 71 | Heptanoic acid            | Carboxylic acid       | not classified                                      |             | an additive in cigarette                              |
| 72 | Hexachlorobutadiene       | Halogenated alkadiene | toxic to aquatic life;<br>possible human carcinogen | CDC<br>EPA  | solvent                                               |
| 73 | Hexadecane                | Alkane                | health hazard                                       | PubChem     | component of fuels                                    |
| 74 | Hexanal                   | Aldehyde              | not classified                                      |             | used in flavor industry                               |
| 75 | Hexane                    | Alkane                | health hazard; toxic to aquatic life                | CDC         | used in leather productions, vegetable oil extraction |
| 76 | Homomenthyl salicylate    | Hydroxyaryl ester     | endocrine disruptor                                 | TEDX        | sunscreen ingredient                                  |
| 77 | Isopropylbenzene (Cumene) | Aryl hydrocarbon      | possible human carcinogen<br>toxic to aquatic life  | IARC<br>CDC | thinner for paints, solvent for resins                |
| 78 | <i>m</i> -Diethylbenzene  | Aryl hydrocarbon      | health hazard; toxic to aquatic life                | PubChem     | solvent                                               |
| 79 | <i>o</i> -Diethylbenzene  | Aryl hydrocarbon      | health hazard; toxic to aquatic life                | CDC         | solvent                                               |
| 80 | <i>m</i> -Xylene          | Aryl hydrocarbon      | endocrine disruptor;<br>toxic to aquatic life       | TEDX<br>CDC | industrial solvent, cleaning agent                    |
| 81 | <i>p</i> -Xylene          | Aryl hydrocarbon      | endocrine disruptor;<br>toxic to aquatic life       | TEDX<br>CDC | industrial solvent, cleaning agent                    |

|    |                         |                    |                                                  |                |                                                                   |
|----|-------------------------|--------------------|--------------------------------------------------|----------------|-------------------------------------------------------------------|
| 82 | Methyl methacrylate     | Ester              | health hazard; toxic to aquatic life             | CDC            | used in inks, toners, paints and coatings, personal care products |
| 83 | Methyl tert-butyl ether | Ether              | endocrine disruptor                              | TEDX           | component in furnishing care, foam seating, bedding products      |
| 84 | Methylene chloride      | Halogenated alkane | possible human carcinogen; toxic to aquatic life | CDC            | solvent in paint strippers, adhesives                             |
| 85 | Naphthalene             | Aryl hydrocarbon   | possible human carcinogen; endocrine disruptor   | IARC<br>TEDX   | moth repellent, household fumigant                                |
| 86 | <i>n</i> -Butyl ether   | Ether              | health hazard; toxic to aquatic life             | CDC            | solvent, used in manufacture of pesticides                        |
| 87 | <i>n</i> -Butylbenzene  | Aryl hydrocarbon   | endocrine disruptor                              | TEDX           | additive in rubber/plastic industries                             |
| 88 | <i>n</i> -Nonane        | Alkane             | health hazard; toxic to aquatic life             | CDC<br>PubChem | fuel additive                                                     |
| 89 | Nonanal                 | Aldehyde           | not classified                                   |                | component of perfumes                                             |
| 90 | <i>n</i> -Propylbenzene | Aryl hydrocarbon   | health hazard; toxic to aquatic life             | PubChem        | used as solvent, fuel additive                                    |
| 91 | Octanal                 | Aldehyde           | not classified                                   |                | component of perfumes                                             |

|     |                                   |                    |                                                |              |                                                           |
|-----|-----------------------------------|--------------------|------------------------------------------------|--------------|-----------------------------------------------------------|
| 92  | Octane                            | Alkane             | health hazard; toxic to aquatic life           | CDC          | component of gasoline                                     |
| 93  | <i>o</i> -Xylene                  | Aryl hydrocarbon   | endocrine disruptor; toxic to aquatic life     | TEDX<br>CDC  | solvent in printing, rubber and leather industries        |
| 94  | <i>p</i> -Diethylbenzene          | Aryl hydrocarbon   | health hazard; toxic to aquatic life           | PubChem      | solvent                                                   |
| 95  | Styrene                           | Aryl hydrocarbon   | possible human carcinogen; endocrine disruptor | IARC<br>TEDX | household product ingredient                              |
| 96  | Tetrachloroethylene               | Halogenated alkene | probable human carcinogen; endocrine disruptor | IARC<br>TEDX | household product ingredient, solvent, dry cleaning agent |
| 97  | Tetradecane                       | Alkane             | health hazard                                  | PubChem      | component of fuels                                        |
| 98  | Tetrahydrofuran                   | Heterocyclic ether | health hazard                                  | CDC          | used in adhesives and sealants                            |
| 99  | Toluene                           | Aryl hydrocarbon   | endocrine disruptor; toxic to aquatic life     | TEDX<br>CDC  | solvent for paints, adhesives                             |
| 100 | <i>trans</i> -1,3-Dichloropropene | Halogenated alkene | possible human carcinogen                      | IARC         | preplanting fumigant                                      |
| 101 | Trichloroethene                   | Halogenated alkane | human carcinogen                               | IARC         | solvent for paints; drying cleaning agent                 |
| 102 | Trichlorofluoromethane            | Halogenated alkane | ozone depleting chemical                       | EPA          | refrigerant                                               |

|     |                         |                    |                                                   |              |                                              |
|-----|-------------------------|--------------------|---------------------------------------------------|--------------|----------------------------------------------|
| 103 | Tridecane               | Alkane             | health hazard                                     | PubChem      | component of fuels                           |
| 104 | Undecane                | Alkane             | health hazard; toxic to aquatic life              | PubChem      | component of fuels                           |
| 105 | Vinyl acetate           | Ester              | possible human carcinogen;<br>endocrine disruptor | IARC<br>TEDX | used in water-based paints, adhesives, glues |
| 106 | Vinyl chloride          | Halogenated alkene | human carcinogen                                  | IARC         | used in manufacture of PVC                   |
| 107 | $\alpha$ -Methylstyrene | Aryl hydrocarbon   | possible human carcinogen                         | IARC         | used in production of plasticizers           |

---

\*: toxicity of volatile organic compounds

\*\* : sources from which data are cited

ATSDR: Agency for Toxic Substances and Disease Registry - the United States Department of Health and Human Services

CDC: Centers for Disease Control and Prevention

EPA: United States Environmental Protection Agency

IARC: International Agency for Research on Cancer – World Health Organization

PubChem: Open Chemistry Database - the United States National Institutes of Health (NIH) (<https://pubchem.ncbi.nlm.nih.gov/>)

TEDX: the Endocrine Disruption Exchange (<https://endocrinedisruption.org/>)
